# Supplementary material for: Synthesis of menthol from citronellal over supported Ru- and Pt-catalysts in continuous flow
Source: Royal Society of Chemistry journal article supplement (doi:10.1039/c9re00346k), 2019-01-01
Supplement: c9re00346k1.pdf [file c9re00346k1.pdf]

# Synthesis of menthol from citronellal over supported Ru- and Pt-catalysts in continuous flow

Muhammad Azkaar<sup>a</sup>, Päivi Mäki-Arvela<sup>a</sup>, Zuzana Vajglová<sup>a</sup>, Vyacheslav Fedorov<sup>a,b</sup>,

Narendra Kumar<sup>a</sup>, Leena. Hupa<sup>a</sup>, Jarl Hemming<sup>a</sup>, Markus Peurla<sup>a</sup>, Atte Aho<sup>a</sup>,

Dmitry Yu. Murzin<sup>\*a</sup>

<sup>a</sup>Johan Gadolin Process Chemistry Centre, Åbo Akademi University, Turku/Åbo, Finland

<sup>b</sup>Saint-Petersburg State Institute of Technology (Technical University), St. Petersburg, Russia

\*dmurzin@abo.fi

## Supporting information

### 1 Experimental

#### 1.1 Synthesis of catalysts for batch reactor

Hexachloroplatinic acid, ( $\text{H}_2\text{PtCl}_6$ , Sigma-Aldrich) was used as a metal precursor to modify H-Beta-25 and H-Beta-300 using evaporation-impregnation method. The mixture was dried overnight at 100 °C in an oven and the resulting 2.5 wt.% Pt/H-Beta-25 and 1 wt.% Pt/ H-Beta-300 catalysts were calcined using a step calcination procedure in a muffle furnace (Table S2). Platinum modified catalysts were reduced at 350 °C for 2 h with a temperature ramp of 10 °C/min prior to each experiment.

Ruthenium(III) chloride trihydrate ( $\text{RuCl}_3 \cdot 3\text{H}_2\text{O}$ , technical, Sigma-Aldrich) was used as a metal precursor to modify H-Beta-300 using evaporation-impregnation method. The mixture was dried overnight at 100 °C in an oven and the resulting 2.5 wt.% Ru/H-Beta-300, which was calcined using a step calcination procedure in a muffle furnace (Table S2). Ruthenium modified catalyst was reduced at 350 °C for 2 h with a temperature ramp of 10 °C/min prior to each experiment.

#### 1.2 One-pot synthesis of menthol in a batch reactor

For each experiment the dried catalyst was weighted and prereduced ex-situ in a glass tube under hydrogen flow of 40 ml/min using the following temperature programme: 25 °C -10 °C/min-350 °C for 2 h. After reduction was completed, the temperature was lowered to the

ambient temperature, and 10 ml of cyclohexane (solvent) was added inside the glass tube and sealed to avoid oxidation.

One-pot synthesis of menthol was performed in a batch reactor using 1 g of the pre-reduced catalyst and 1.2 g of citronellal dissolved in 90.2 ml of cyclohexane. After assembling, the reactor was flushed with an inert gas ( $\cong 95\%$  N<sub>2</sub>,  $\cong 5\%$  Ar, AGA) for 5-10 minutes. The reactor was then heated to 35 °C and pressurized with hydrogen (99.99%, AGA) to 10 bar. A stirring rate of 900 rpm was selected to avoid external mass transfer limitations during the reaction and the sieved catalyst particles below  $<63\ \mu\text{m}$  were used to suppress the internal mass transfer limitations. The liquid phase samples were taken with a certain time interval and analyzed by GC.

## 2 Results

Supporting figures are shown here.

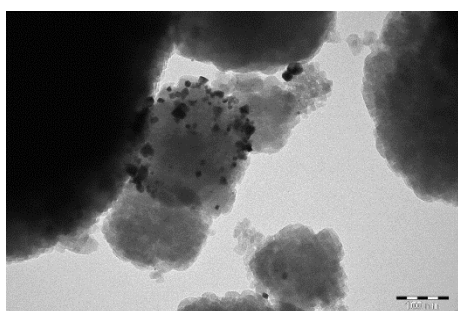

a)

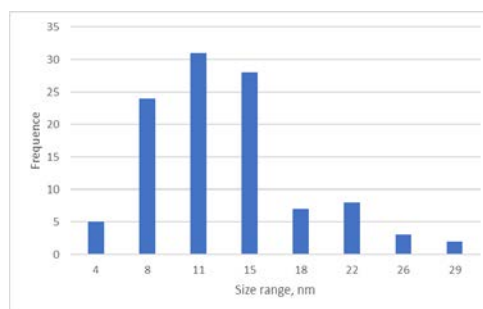

b)

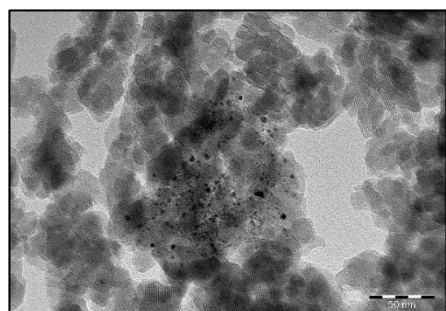

c)

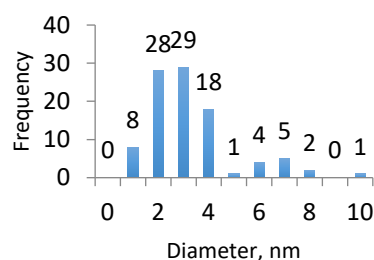

d)

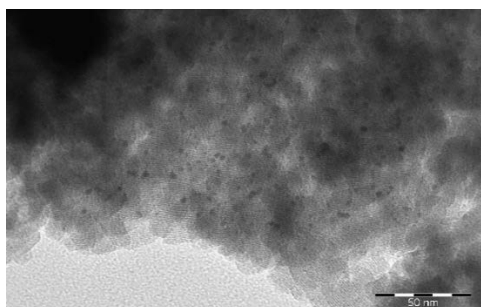

e)

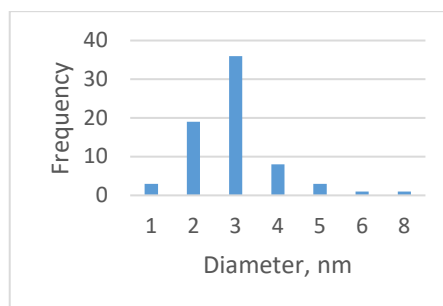

f)

Fig. S1 TEM image and metal particle size distribution for a, b) fresh 1 wt% Pt/H-Beta-300, c,d) fresh and e,f) spent 2.5 wt% Pt/H-Beta-25.

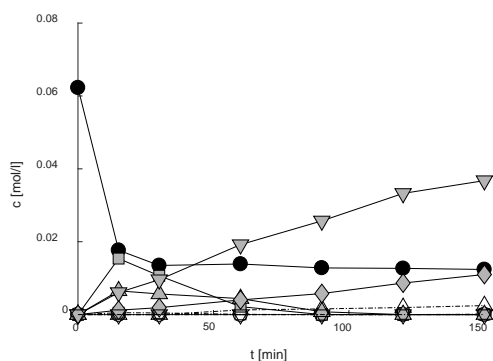

Fig. S2 Concentration of citronellal (●), citronellol (○), 3,7-dimethyloctanal (□), 3,7-dimethyloctanol (Δ), (-)-isopulegol (■), neoisopulegol (▲), menthol (▼), neomenthol (◆), dimeric ethers (∇) as a function of time in one-pot synthesis of menthols from citronellal at 35 °C under 10 bar over 2.5 wt% Ru/H-Beta-300.

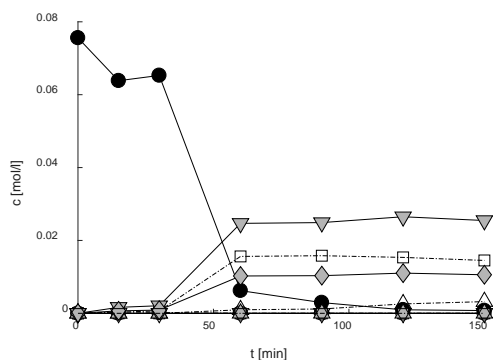

a)

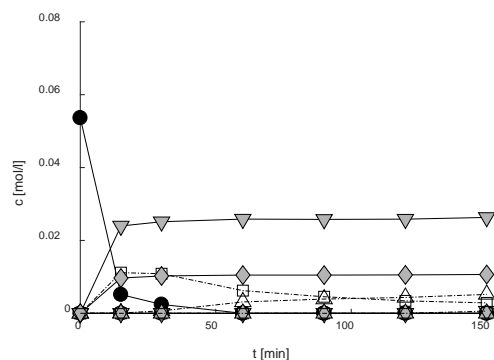

b)

Fig. S3 Concentration of citronellal (●), citronellol (○), 3,7-dimethyloctanal (□), 3,7-dimethyloctanol (Δ), (-)-isopulegol (■), neoisopulegol (▲), menthol (▼), neomenthol (◆), dimeric ethers (∇) as a function of time in one-pot synthesis of menthols from citronellal at 35 °C under 10 bar total pressure in hydrogen over a) 1 wt% Pt/H-Beta-300, b) 2.5 wt% Pt/H-Beta-25.

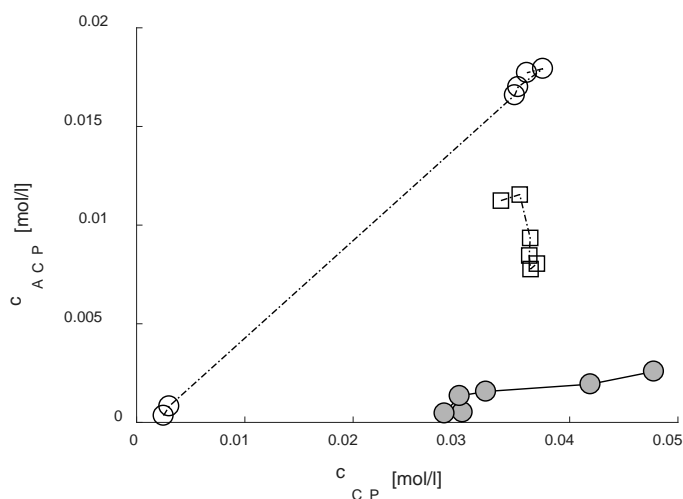

Fig. S4 Concentrations of sum of hydrogenation products (ACP) vs concentration of the sum of cyclization products (CP) in one-pot synthesis of menthol in a batch reactor at 35 °C under 10 bar total pressure in the presence of hydrogen. Symbols: 2.5 wt% Ru/H-Beta-300 (●), 1 wt% Pt/H-Beta-300 (○) and 2.5 wt% Pt/H-Beta-25 (□).

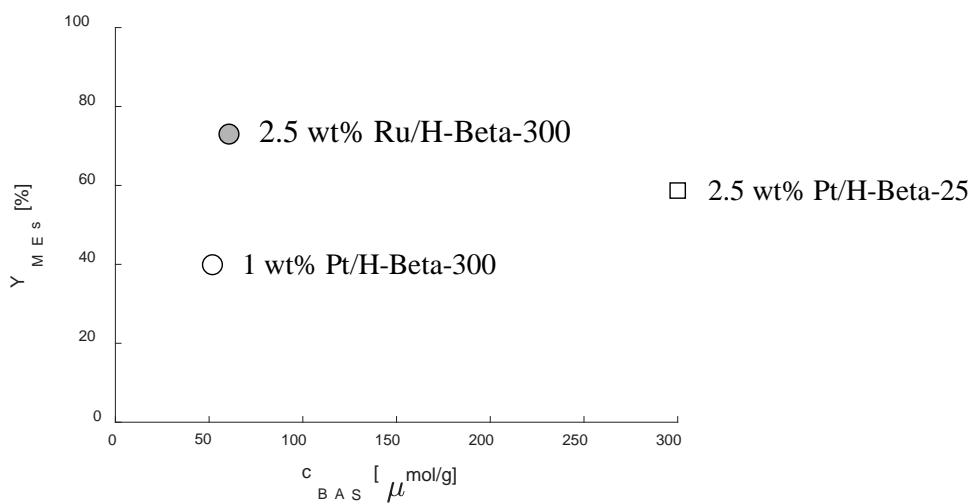

Fig. S5 The yield of menthols at 80% conversion in a batch reactor in one-pot synthesis of menthol from citronellal at 35 °C under 10 bar total pressure in H<sub>2</sub> pressure (if not otherwise stated) over different powder catalysts as a function of Brønsted acid site concentration.

**Table S1**Step calcination program for NH<sub>4</sub>-Beta-25

| Steps | Time, min | Temperature, °C |
|-------|-----------|-----------------|
| Ramp  | 65        | 200             |
| Dwell | 50        | 200             |
| Ramp  | 75        | 500             |
| Dwell | 240       | 500             |
|       | 100       | 25              |

**Table S2**

Step calcination programs for Ru and Pt catalysts

| Catalyst     | Steps | Time, min | Temperature, °C |
|--------------|-------|-----------|-----------------|
| Ru-catalysts | Ramp  | 65        | 200             |
|              | Dwell | 50        | 200             |
|              | Ramp  | 45        | 400             |
|              | Dwell | 180       | 400             |
|              |       | 100       | 25              |
|              | Ramp  | 75        | 250             |
| Pt-catalysts | Dwell | 50        | 250             |
|              | Ramp  | 65        | 400             |
|              | Dwell | 180       | 400             |
|              |       | 100       | 25              |

**Table S3**

Specific surface area and pore volume of the catalysts

| Catalyst (powder)      | Specific Surface Area<br>(m <sup>2</sup> /g <sub>cat</sub> ) | Pore Volume<br>(cm <sup>3</sup> /g <sub>cat</sub> ) | Ref |
|------------------------|--------------------------------------------------------------|-----------------------------------------------------|-----|
| H-Beta-25              | 681                                                          | 0.69                                                | 1   |
| H-Beta-300             | 629                                                          | 0.43                                                |     |
| 2.5 wt.% Ru/H-Beta-300 | 548 (214)                                                    | 0.19 (0.29)                                         | CW  |
| 1.0 wt.% Pt/H-Beta-300 | 592                                                          | 0.21                                                |     |
| 2.5 wt.% Pt/H-Beta-25  | 686                                                          | 0.24                                                |     |

CW – current work

**Table S4**

Brønsted and Lewis acid sites determined by pyridine adsorption desorption with FTIR.

Notation: 250 °C = sum of weak (w) +medium (m) +strong (s) acid sites, 350 °C = m + s, 450 °C = s

| Catalyst (powder)      | Brønsted acidity, μmol/g |        |        | Lewis acidity, μmol/g |        |        | Ref |
|------------------------|--------------------------|--------|--------|-----------------------|--------|--------|-----|
|                        | 250 °C                   | 350 °C | 450 °C | 250 °C                | 350 °C | 450 °C |     |
| H-Beta-25              | 261                      | 203    | 181    | 54                    | 24     | 13     | 1   |
| H-Beta-300             | 66                       | 50     | 23     | 11                    | 5      | 3      |     |
| 2.5 wt.% Ru/H-Beta-300 | 61                       | 2      | 0      | 6                     | 0      | 0      | CW  |
| 1.0 wt% Pt/H-Beta-300  | 52                       | 0      | 0      | 3                     | 0      | 0      |     |
| 2.5 wt% Pt/H-Beta-25   | 300                      | 16     | 0      | 88                    | 2      | 0      |     |

CW – current work

**Table S5**

Results from EDX analysis from the bifunctional catalysts and bifunctional extrudates as a function of weight percent (wt.%)

| Catalyst (powder)      | O     | Al  | Si    | Other elements | Si/Al | Si/Pt, Si/Ru |
|------------------------|-------|-----|-------|----------------|-------|--------------|
| 2.5 wt.% Ru/H-Beta-300 | 74.54 | 0.5 | 23.29 | Ru= 1.67       | 46.6  | 13.9         |
| 2.5 wt.% Pt/H-Beta-25  | 51.5  | 3.4 | 42.6  | Pt= 2.5        | 12.5  | 17           |

**Table S6**

Average metal particle size determined by TEM

| Catalyst (powder)      | Avg. particle size (nm) | Dispersion*, (%) |
|------------------------|-------------------------|------------------|
| 2.5 wt.% Ru/H-Beta-300 | 17 (13)                 | 6 (7.7)          |
| 2.5 wt.% Pt/H-Beta-25  | 3.3 (3)                 | 30 (35)          |
| 1.0 wt.% Pt/H-Beta-300 | 13                      | 8                |

\*calculated by 100/average particle size

**Table S7****Table S7**

Results from one pot synthesis of menthol from citronellal in a batch reactor at 35 °C at 10 bar total pressure in H<sub>2</sub> (if not else state) in cyclohexane. Conversion of citronellal (X) and liquid phase mass balance (GCLPA) are given at 150 min of time. Yields (Y) of different products, stereoselectivity (SS), reaction rate (r) and TOF<sub>80</sub> are given at 80% conversion. Conditions: amount of catalyst 1 g, the initial citronellal concentration 0.086 M

| Catalyst (powder)     | Initial TOF<br>s <sup>-1</sup> | X    | GCLPA | Y <sub>Ps</sub><br>% | Y <sub>MEs</sub> | Y <sub>ACS</sub> | Y <sub>DM</sub> | Y <sub>CS</sub> / Y <sub>ACS</sub><br>- | SS <sub>IP</sub> | SS <sub>ME</sub><br>% | r<br>mol/s·g                                       | TOF <sub>80</sub><br>s <sup>-1</sup> | Δt<br>min    |
|-----------------------|--------------------------------|------|-------|----------------------|------------------|------------------|-----------------|-----------------------------------------|------------------|-----------------------|----------------------------------------------------|--------------------------------------|--------------|
| 2.5 wt% Ru/H-Beta-300 | 0.45                           | 80.1 | 100   | 0.0                  | 72.9             | 3.9              | 0.0             | 18.8                                    | 0.0              | 71.3<br>(83.1)*       | 4.95·10 <sup>-7</sup><br>(4.26·10 <sup>-6</sup> )* | 0.05<br>(0.43)*                      | 15<br>(8.4)* |
| 1.0 wt% Pt/H-Beta-300 | 0.54                           | 99.0 | 76.6  | 0.0                  | 39.8             | 18.6             | 0.0             | 2.1                                     | 0.0              | 70.2                  | 1.72·10 <sup>-6</sup>                              | 0.43                                 | 55.5         |
| 2.5 wt% Pt/H-Beta-25  | 0.54                           | 100  | 89.2  | 0.0                  | 58.7             | 25.4             | 0.0             | 2.3                                     | 0.0              | 71.2                  | 4.49·10 <sup>-6</sup>                              | 0.11                                 | 13.3         |

\*at 40% conversion, Ps – pulegols = isopulegol (IP) + neoisopulegol (NIP) + isoisopulegol (IIP) + neoisopulegol (NIIP), MEs – menthols: menthol (ME) + neomenthol (NME), CS – cyclic products: pulegols + menthols, ACS – acyclic monomeric products: citronellol (CLOL) + 3,7-dimethyloctanal (DMA) + 3,7-dimethyloctanol (DMO) + nerol (NRL) + geraniol (GRN), DM – dimeric ethers, SS<sub>IP</sub> – stereoselectivity of isopulegol = IP/ΣPs, SS<sub>ME</sub> – stereoselectivity of menthol = ME/ΣMEs, Δt – time interval for reaction rate calculation.



### **3 References**

1 Z. Vajglová, N. Kumar, M. Peurla, J. Peltonen, I. Heinmaa and D.Yu. Murzin, *Catal. Sci. Technol.*, 2018, **8**, 6150-6162.
